# Supplementary material for: Increased H+ efflux is sufficient to induce dysplasia and necessary for viability with oncogene expression
Source: eLife journal article supplement (doi:10.7554/elife.03270), 2015-03-19

## Figure 1 – figure supplement 2

### B. Localization of *Dm* Nhe2 in NHE1-deficient mammalian fibroblast cells

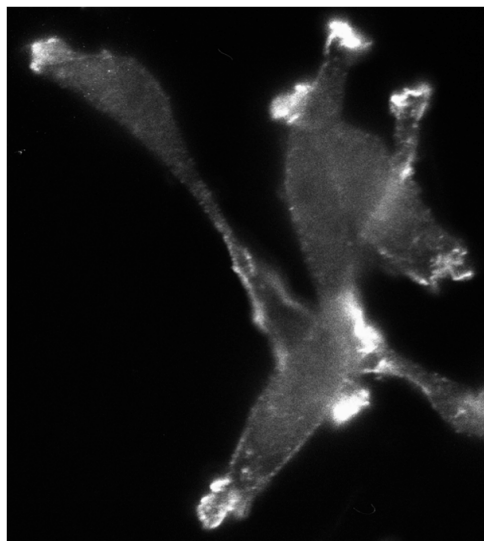

Supplement: supp [file elife-03270-supp-v1.zip]
