# Supplementary material for: Increased H+ efflux is sufficient to induce dysplasia and necessary for viability with oncogene expression
Source: eLife journal article supplement (doi:10.7554/elife.03270), 2015-03-19
Supplement: supp [file elife-03270-supp-v1.zip]

## Figure 1 – figure supplement 1

### A. Protein sequence alignment of *Hs* NHE1 (uniprot P19634-1) and *Dm* Nhe2 (B7YZY1)

|         |                                                               |      |                         |
|---------|---------------------------------------------------------------|------|-------------------------|
| Hs_NHE1 | LVDLLAVKKKQETKRSINEEIHQTFLDHLITGIEDICGHYGHWWKDKLNRFNKKYVKKC   | 561  | KRA motif               |
| Dm_Nhe2 | LVKILNVKRAANKRKPTMNERIHERFMDHLMAGIEDIVGKTGNYNVRDKFKRFDNRFIRPL | 659  | CHP2 interaction domain |
| Hs_NHE1 | LIAGERSKEPQLIAFYHKMEMKQAIELVESGG--MGKIPSAVSTVSMQNIHPKSLPSE-   | 618  |                         |
| Dm_Nhe2 | LIRDLKGAEPKIIETYSKLTMRDAMEVMRRNPSTIGQMTGTESMSALFRNYTNNYIGGRW  | 719  |                         |
| Hs_NHE1 | -----ILPALSKDKEEEIRKILRNNLQKT-RQRLRS                          | 648  |                         |
| Dm_Nhe2 | APPTIYTTCPSLTNLDNTCSRNLDMAELDYNPSKKDLTDARIHLLAEELKPYRRHRRLS   | 779  | Akt phos.               |
| Hs_NHE1 | YNRHTLVADPYEEAWNQMLLR-----                                    | 670  |                         |
| Dm_Nhe2 | YSRHAVDDRDLSTQVNYKMQMNFRRMFNDRKHHKRSKRGASNKEAKENVKQNHVSFHDFO  | 839  |                         |
| Hs_NHE1 | -----                                                         |      |                         |
| Dm_Nhe2 | QNGTTKQLTNAEECQQNPNEINVVGPSDDWDDGLTFTAKSS-----LAEHPIP         | 887  |                         |
| Hs_NHE1 | QKARQLEQKINNYLTPAHKLDSPMTSRARIGSDPLAYEPKEDLPVITIDP-----       | 721  |                         |
| Dm_Nhe2 | EEDRNLSRESDGERRVATPTATESQLPWKRQGDECTDAVQQNEFPWASNKEYLAYNSPS   | 947  |                         |
| Hs_NHE1 | -----ASPQSPESVDLVNEELKGKVLGLSRDPAKVAEEDE-DDDGGIMMRSKETSSPG    | 773  |                         |
| Dm_Nhe2 | ATFLGGINKPKQPKSVIGLFRRESSSSKAGSVGVGSTGAMDSAASGSETMVVSMSSQPPN  | 1007 |                         |
| Hs_NHE1 | TDDVFTPAPSDSPSQRIRCLSDPGHPPEPGESEP-----                       | 809  |                         |
| Dm_Nhe2 | APSTSIHNPRLDKRSQSISSSSSLGAGAHQLGPEGHSGFFPVTASHRRNVRRGSMLELSGD | 1127 | ATM/ATR phos.           |
| Hs_NHE1 | -----FFPKGQ-----                                              | 815  |                         |
| Dm_Nhe2 | TIPEESSYQHGHSKSLCEPADSDEWEGAPLSAAGGANSELLMRMSGREPLLPRPSNTPRA  | 1189 |                         |
| Dm_Nhe2 | QIRRMNAGAVGGAGVSQAGRKNQVTKALLDYEDSETDSDENDDDEDEDFDSYDDENIVVT  | 1187 |                         |
| Dm_Nhe2 | FTTPATGRRPGSSPGSGSEANTATTTTTSIRLTRNNDESII                     | 1229 |                         |
